# Supplementary material
Source: publisher site journal article supplement (https://www.degruyterbrill.com/publication/journal_key/DEMO/downloadAsset/DEMO_SI%20In%20Memory%20of%20Abe%20Sklar%20-%20print.zip)
Supplement: Supplementary file 2 [file DEMO IN MEMORY OF ABE SKLAR (COVER).pdf › DEMO IN MEMORY OF ABE SKLAR (COVER).pdf]

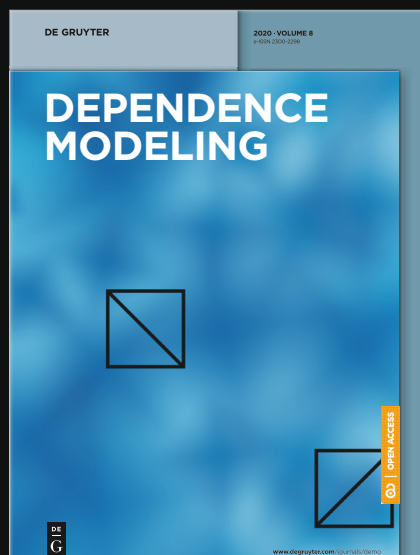

**Editor-in-Chief:**

**Giovanni Puccetti**, *Università degli Studi di Milano, Italy*

**Associate Editors:**

**Fabrizio Durante**, *Università del Salento, Italy*

**Matthias Scherer**, *Technische Universität München, Germany*

**Steven Vanduffel**, *Vrije Universiteit Brussel, Belgium*

Covered by: **Web of Science - Emerging Sources Citation Index, SCOPUS, MathSciNet, zbMATH**

The journal **DEPENDENCE MODELING** aims at providing a medium for exchanging results and ideas in the area of multivariate dependence modeling. It is an open access fully peer-reviewed journal providing the readers with free, instant, and permanent access to all content worldwide.

## WHY SUBMIT?

- ▶ promotion of each published article in the scientific community
- ▶ first journal focusing on the modeling of dependence
- ▶ fast, fair and constructive peer review
- ▶ secure archiving by De Gruyter and the independent archiving service Portico
- ▶ liberal policies on copyrights – the copyrights are governed by the Creative-Commons Attribution Only license (CC-BY) compliant with Plan-S

**Editorial Contact**

**Giovanni Puccetti**

[demo.editorial@degruyter.com](mailto:demo.editorial@degruyter.com)

## How to submit?

Please submit your manuscripts via Editorial Manager submission system at [www.editorialmanager.com/depmo](http://www.editorialmanager.com/depmo)

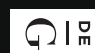

**DEPENDENCE MODELING | VOL. 9**  
SPECIAL ISSUE IN MEMORY OF ABE SKLAR

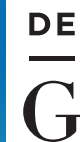

DE GRUYTER

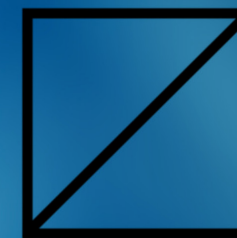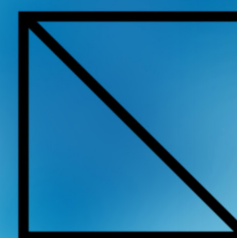

JOURNAL

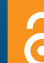

# DEPENDENCE MODELING

**SPECIAL ISSUE IN MEMORY OF ABE SKLAR**

GUEST EDITORS: ROGER NELSEN AND CARLO SEMPI

[degruyter.com/demo](http://degruyter.com/demo)
